# Caveolin-1, caveolae, and glioblastoma

Marie-Odile Parat and Gregory J. Riggins

University of Queensland School of Pharmacy, PACE, Woolloongabba, QLD, Australia (M-O.P.); Ludwig Collaborative Laboratory, Department of Neurosurgery, Johns Hopkins University School of Medicine, Baltimore, Maryland (G.J.R.)

Glioblastoma multiforme (GBM) is the most common malignant brain tumor and is characterized by high invasiveness, poor prognosis, and limited therapeutic options. Biochemical and morphological experiments have shown the presence of caveolae in glioblastoma cells. Caveolae are flask-shaped plasma membrane subdomains that play trafficking, mechanosensing, and signaling roles. Caveolin-1 is a membrane protein that participates in the formation of caveolae and binds a multitude of signaling proteins, compartmentalizing them in caveolae and often directly regulating their activity via binding to its scaffolding domain. Caveolin-1 has been proposed to behave either as a tumor suppressor or as an oncogene depending on the tumor type and progress. This review discusses the existing information on the expression and function of caveolin-1 and caveolae in GBM and the role of this organelle and its defining protein on cellular signaling, growth, and invasiveness of GBM. We further analyze the available data suggesting caveolin-1 could be a target in GBM therapy.

**Keywords:** caveolae, caveolin-1, EGF receptor, glioblastoma, uPA.

## Caveolin-1 and Caveolae

Caveolae are plasma membrane subdomains of distinct lipid and protein compositions present in many mammalian cells. These flask-shaped organelles play multiple roles in cell physiology, including serving as signaling platforms for numerous pathways, as clathrin-independent routes of endocytosis, and as mechanical stress sensors.<sup>1</sup> The functions of caveolae require proteins of the caveolin family and, most importantly, caveolin-1, a membrane integral protein key to caveola structure. Caveolins oligomerize and, in concert with cytoplasmic proteins of the cavin

family, allow caveolae to form.<sup>2,3</sup> Caveolin-1 exhibits an unusual conformation with a short membrane-inserted domain and its N- and C- termini both facing the cytosol. Caveolin-1 C-terminus is triply palmitoylated,<sup>4</sup> and the N-terminus encompasses a putative cholesterol-binding domain,<sup>5</sup> a scaffolding domain,<sup>6</sup> and functionally important serine<sup>7</sup> and tyrosine<sup>8</sup> phosphorylation sites.

In addition to participating in caveola formation, caveolin-1 is known to directly interact via its scaffolding domain with multiple signaling proteins and to regulate their activity. These proteins include important regulators of cell transformation and growth.<sup>9</sup> Furthermore, caveolin-1 is best known as a membrane protein, but noncaveolar, soluble, and secreted forms of caveolin-1 have also been described and seem to have biological functions (reviewed in Parat<sup>1</sup>). Both caveolar and noncaveolar caveolin-1 are involved in modulating cancer cell growth and metastasis. This is reviewed elsewhere<sup>9–12</sup> and will only be briefly mentioned to keep our review focused on glioblastoma multiforme (GBM).

Caveolin-1 has been proposed to behave as a tumor suppressor or an oncogene, depending on the tumor type. Initially, caveolin-1 was regarded as a tumor suppressor. Its expression increased with differentiation, and its loss was associated with de-repression of growth-promoting signaling. The gene encoding caveolin-1 was mapped to the human chromosome 7q31.1, where a known fragile site frequently deleted in human cancers is also located.<sup>13</sup> Mutation or loss of caveolin-1 expression because of heterozygosity or promoter hypermethylation were described in multiple cancers, such as breast, ovarian, small cell lung, small cell bladder, or colorectal carcinomas (reviewed in van Golen<sup>9</sup>). In contrast, overexpression of caveolin-1 was reported in a number of malignancies, including prostate cancer. In prostate cancer, caveolin-1 expression and secretion are increased and caveolin-1 contributes to tumor angiogenesis, growth, and metastasis.<sup>14–16</sup> In addition to being tumor type-specific, caveolin-1 expression is now accepted to be tumor stage-specific, with decreased expression favoring proliferation and survival at early stages, followed by upregulated expression

Received January 23, 2012; accepted February 27, 2012.

**Corresponding Author:** Marie-Odile Parat, University of Queensland School of Pharmacy, PACE, 20 Cornwall St., Woolloongabba QLD 4102, Australia (m.parat@uq.edu.au).

accompanying invasiveness, metastasis, and multidrug resistance at later stages.<sup>12</sup> A distinct role for caveolin-1 in tumor cells versus caveolin-1 expressed by stromal cells is emerging, bringing increasing complexity to the picture.<sup>17,18</sup> Lastly, recent evidence suggests that there might be a different role and a different significance for caveolin-1 in cancer cells, depending on its subcellular localization, with noncaveolar caveolin-1 increasing tumor aggressiveness.<sup>19,20</sup>

In addition to caveolins, caveola formation and functions are now known to involve a family of cytoplasmic proteins named cavins. Cavin-1, or polymerase I and transcript release factor (PTRF), is the only cavin indispensable for caveola formation.<sup>2,21</sup> It also plays roles in transcription termination via interaction with RNA polymerase I<sup>22,23</sup> and in regulation of type I collagen gene expression by interacting with a DNA-binding transcription factor.<sup>24</sup> Of the other members of the cavin family, the serum-deprivation response (SDPR/cavin-2) participates in caveolar membrane curvature,<sup>25</sup> the SDR-related gene product that binds to C kinase (SRBC/cavin-3) regulates caveolar budding,<sup>26</sup> and the muscle restricted coiled-coil protein (MURC/cavin-4) is muscle specific.<sup>21</sup> Dysregulated expression of proteins from the cavin family in cancer is documented.<sup>27,28</sup> The expression of PTRF usually mirrors that of caveolin-1 in normal and tumor tissue.<sup>2,21,27</sup> When not expressed, however, the absence of PTRF results in the expression of noncaveolar caveolin-1,<sup>2</sup> which may have functional consequences.<sup>19,29</sup> PTRF was identified as a gene increasing chemoresistance of colorectal cancer cells.<sup>30</sup> Of interest, PTRF was detected in a phosphoproteomic study as a substrate in which tyrosine phosphorylation increases 5-fold in cells expressing constitutively active forms of the EGF receptor.<sup>31</sup> The significance of PTRF tyrosine phosphorylation is unknown at present.

Caveolae and caveolin-1 regulate signaling molecules by various mechanisms.<sup>1</sup> Compartmentalization in caveolae promotes optimal signal transduction via proximity of signaling partners, but several caveolin-1-binding proteins (including receptor tyrosine kinases, heterotrimeric G-proteins, Src family tyrosine kinases, and H-ras) are tonically inhibited by caveolin-1. Some signaling molecules can further be endocytosed via caveolae. Lack of caveolin-1 can result in de-repression of a normally inactive pathway that is maintained by the binding of caveolin-1 to a signaling molecule. For example, the epidermal growth factor receptor (EGFR) is proposed to accumulate in caveolae, where it is inhibited by interaction with the caveolin-1 scaffolding domain.<sup>32,33</sup> In this model, in caveolae, the EGFR is in proximity with downstream signaling molecules, such as Ras. After stimulation, the EGFR moves away from caveolae domains, Raf-1 is recruited to Ras, and activation of the Ras/Raf-1/MAPK pathway is initiated within caveolae.<sup>32</sup> This pathway is further controlled downstream by direct inhibition of the kinase activity of MEK-1 and ERK-2 by caveolin-1.<sup>34</sup> Of note, caveolar localization of EGFR is not unanimously accepted.<sup>35</sup> Caveolin-1 deficiency also results in a lack of caveolae that can cause a loss of proximity between signaling

molecules that need compartmentalization for efficient signal transduction.<sup>36</sup> Furthermore, the absence of caveolae can alter the internalization of receptors or effectors whose subcellular localization is essential for activity.

Caveolin-1 is a substrate for kinases of the Abl and Src families. Tyrosine 14 phosphorylation of caveolin-1 occurs after integrin ligation, growth factor stimulation (including EGF stimulation), and oxidative stress<sup>37</sup> and has been linked to cell migration via a series of experiments, showing that caveolin-1 polarization in transminating cells requires Tyr<sup>14,38,39</sup> and that Tyr<sup>14</sup> phosphorylated caveolin-1 confers binding to SH2-containing proteins regulating cell motility<sup>40,41</sup> and plays a structural and signaling role at focal adhesions.<sup>42,43</sup> Caveolin-1 Tyr<sup>14</sup> further mediates mechanotransduction.<sup>44</sup> In addition, caveolin-1 phosphorylation is associated with endocytosis, including integrin-mediated caveolae internalization, which when deregulated, can allow anchorage-independent growth.<sup>45</sup>

## Expression and Functions of Caveolin-1 in Astrocytes

Much less is known about caveolin-1 expression and functions in the different cell types of the brain, compared with other cell types, in part because the brain expresses much less caveolin-1 than do other tissues. However, caveolin-1 expression has been documented in neurons and glia. The abundance of caveolin-1 mRNA varies in different parts of the brain.<sup>46</sup>

Caveolae have been observed in early studies of optic nerve astrocytes using thin section and freeze fracture electron microscopy and were abundant in areas of the plasma membrane facing other astrocytes (up to 17 caveolae per micrometer<sup>2</sup>) or opposed to myelin sheaths.<sup>47</sup> Caveolae were also found in host astrocytes invading neural transplants<sup>48</sup> or in cultured rat primary astrocytes.<sup>49</sup> In a comprehensive study of caveolin-1 expression in astrocytes, caveolin-1 alpha (full length) isoform was detected by Western blot analysis in low-density, detergent-insoluble microdomains from type 1 astrocytes. Immunofluorescence microscopy of primary cells revealed a punctuate pattern resembling that of other caveolin-1-expressing cells. Caveolin-1 messenger RNA was detected in primary astrocytes, both by Northern analysis and reverse-transcriptase polymerase chain reaction.<sup>50</sup> Caveolin-2, which is co-expressed and co-oligomerizes with caveolin-1 in most tissues, is also present in astrocytes.<sup>51</sup>

The functions of caveolin-1 and caveolae in astrocytes are consistent with what is known in other cell types: they participate in signaling and trafficking. Studies specifically identifying caveolar signaling in astrocytes include biochemical evidence that endothelin-1 mitogenic signaling leading to FAK and ERK activation is localized in caveolae.<sup>52</sup> In addition, reactive oxygen species-induced activation of ERK in astrocytes was shown to require caveolin-1 expression.<sup>53</sup>

Calcium signaling molecules, such as TRPC1, IP3R2, and ryanodine receptor, were co-fractionated with caveolin-1 in astrocytes detergent insoluble fractions.<sup>54</sup> Another example is interleukin beta receptor type I (IL-1RI)/Toll-like receptor type 4 (TLR4), shown to be recruited to caveolae after activation and to initiate downstream signaling in caveolae.<sup>55</sup> Of interest, this pathway can be activated by ethanol and may mediate ethanol-induced inflammatory damage in the brain.<sup>55</sup> In astrocytes, caveolin-1 was also documented to compartmentalize and interact with multidrug resistance protein -1 (MDR1), also named P-glycoprotein-1 (P-gp), which participates in the blood-brain barrier (BBB) function.<sup>56</sup>

Caveolae have also been proven to play trafficking functions in primary cultured astrocytes.<sup>57</sup> Albumin endocytosis was localized to caveolae by electron microscopy and required the expression of caveolin-1.<sup>58</sup> Caveolae also internalize the CCR2 receptor-bound ligand MCP-1,<sup>59</sup> and caveolin-1 siRNA reduced calcium influx and astrocyte chemotaxis to MCP-1.<sup>60</sup> Caveolin-1 further regulates cell surface expression and endocytosis of the excitatory amino acid carrier 1 (EAAC1) glutamate transporter in neuron/astrocytes mixed cultures.<sup>61</sup> Caveolin-1 is known to participate in cholesterol trafficking. Accordingly, in astrocytes, caveolin-1 was shown to participate in cholesterol efflux to generate HDL<sup>62</sup> and to mediate the retrograde cholesterol transport from the plasma membrane to the Golgi in response to amyloid beta protein.<sup>63</sup>

Little is known about the regulation of caveolin-1 expression in astrocytes. A study determined that a single dose of gamma ray irradiation increased caveolin-1 expression in spinal cord astrocytes 1 day after irradiation.<sup>64</sup> In another study, primary astrocytes isolated from the striatum underwent caveolin-1 downregulation at the protein and mRNA levels in response to cAMP and TGF- $\alpha$ . TGF- $\alpha$ -induced downregulation of caveolin-1 expression was MAP kinase-independent but PI3-kinase dependent. Furthermore, this regulation was restricted to the striatum because it was not observed in astrocytes from other brain regions. The authors hypothesized that downregulation of caveolin-1 was part of a feedback regulatory loop involving PI3K, promoting the expression of the glutamate transporter GLT-1 during astrocyte differentiation.<sup>51</sup>

### Caveolin-1 and Caveolae in GBM Cells

The literature widely describes an increased expression of caveolin-1 in GBM (Table 1). However, some nuances must be kept in mind when looking at these results. First, GBMs are a mix of tumor and infiltrating nontumor cells.<sup>65</sup> GBM lysates are likely to contain abundant caveolin-1-expressing cells (microglia, macrophages, and endothelial cells, in addition to GBM cells), compared with neurons in normal brain tissue, known to express very little caveolin-1. Moreover, there seems to be heterogeneity in caveolin-1 expression between tumor cells in each GBM, indicating

that caveolin-1-positive and negative tumor cells coexist in GBM.<sup>66,67</sup>

Identification of differentially expressed genes in human GBM comparing RNA pooled from 2 GBMs to RNA pooled from normal human brain identified a 5.2-fold overexpression of caveolin-1 mRNA in GBM.<sup>68</sup> Similarly, caveolin-1 mRNA was found to be increased in the GBM cell line U87MG, compared with primary human astrocytes, and in tumors, compared with nonmalignant brain tissue.<sup>69</sup> In contrast, caveolin-2 and -3 mRNA were reported to be decreased in a GBM cell line, compared with primary astrocytes.<sup>69</sup> In another study, caveolin-1 immunoreactivity was detected in astrocytic-derived tumors, with very intense staining in GBMs, whereas no immunoreactivity was detected in normal brain glia or neurons. Both staining pattern (membrane vs intracellular) and intensity were associated with tumor grade. Immunofluorescence analysis and flow cytometry confirmed with glioma cell lines and primary cultures the results observed in tissue sections.<sup>66</sup>

In various human GBM-derived cell lines (T98G, U87MG, U118MG, U138MG, and U373MG) and in rat primary astrocytes and transformed astroglial cell lines (C6 and DITNC1) abundant caveolin-1 mRNA and protein levels were detected, although with variable levels. Nucleotide sequence analysis further indicated that no mutations were present in any of the cell types.<sup>70</sup> Of importance, caveolin-1 low-buoyant density and caveola formation were shown to be maintained.<sup>70</sup> Caveolae were still apparent when the cells were grown ectopically in mice.<sup>70</sup> Accordingly, caveolae have also been reported after electron microscopy observation of GBM specimens.<sup>71</sup> Caveolae endocytosis has been proposed as a route of entry into GBM cells (T98G) for uptake of therapeutic siRNA dendriplexes, further indicating that caveolae in GBM cells are functional, and that they may be taken advantage of for therapeutic delivery.<sup>72</sup>

The published information about caveolin-1 increased expression in GBM is recapitulated in Table 1. We found no literature on quantification of caveolin-1 tyrosine 14 phosphorylation in GBM or on the expression of the caveolae-forming protein, PTRF/cavin-1, in GBM.

### Antitumor Therapies of Glioma Are Associated With/Act Via Upregulation of Caveolin-1

An increased expression of caveolin-1 has been shown to be associated with and/or mediate the action of some anti-glioma therapies. One such therapeutic class are the inhibitors of the catalytic light chain (xCT) of system xc-, a Na<sup>+</sup>-independent heterodimeric amino acid transport system that allows cystine uptake in exchange for glutamate release. Glioma cells produce high concentrations of glutamate using this transporter, which causes toxicity to healthy neurons surrounding the

**Table 1.** Caveolin-1 Expression in Glioblastoma Multiforme

| Family member tested | Method                                          | Tested sample                                                                 | Control                                                         | Variation observed                                                                                                    | Amplitude of the variation                                                                                                                          | Reference |
|----------------------|-------------------------------------------------|-------------------------------------------------------------------------------|-----------------------------------------------------------------|-----------------------------------------------------------------------------------------------------------------------|-----------------------------------------------------------------------------------------------------------------------------------------------------|-----------|
| Caveolin-1           | DNA microarray                                  | Pooled mRNA from 2 GBM                                                        | Normal brain tissue mRNA, pooled                                | Increased                                                                                                             | 5.2-fold                                                                                                                                            | 68        |
| Caveolin-1           | Northern blotting and immunoblotting            | mRNA and protein lysates from C6 and DITNC1 transformed astroglial cell lines | Rat type 1 primary astrocytes                                   | Increased in C6 but not DITNC1 transformed astrocyte cell lines compared to astrocytes                                | 2-fold (mRNA) and 1.5-fold (protein) increased in C6 cell line                                                                                      | 70        |
| Caveolin-1, 2, 3     | RT-PCR and Q-PCR                                | mRNA from GBM cell line U87MG                                                 | fetal primary astrocytes                                        | Increased caveolin-1 mRNA in GBM but reduced caveolin-2 and caveolin-3                                                | ~1.5-fold increase (cav-1 mRNA) and 2+ fold decrease (caveolin-2 and 3 mRNA)                                                                        | 69        |
| Caveolin-1           | Q-PCR                                           | mRNA from 6 surgically removed GBM                                            | Two samples of non-malignant brain lesions                      | Increased caveolin-1 mRNA in GBM tissue                                                                               | 20–300 fold difference                                                                                                                              | 69        |
| Caveolin-1           | IHC                                             | 19 GBM                                                                        | Astrocytoma II and III, normal brain tissue                     | Increased caveolin-1 immunoreactivity associated with tumor grade - Increased plasma membrane localization in GBM     | N/A                                                                                                                                                 | 66        |
| Caveolin-1           | Confocal immunofluorescence microscopy and FACS | U251 MG GBM cell line and 4 primary glioma cultures                           |                                                                 | Punctate staining of caveolin-1 at the plasma membrane in primary GBM cells and GBM cell line reminiscent of caveolae | Significantly more caveolin-1 in GBM compared with grade III astrocytoma                                                                            | 66        |
| Caveolin-1           | Western blot analysis of tissue lysates         | 9 GBM                                                                         | Normal brain tissue                                             | No statistically significant change in caveolin-1 expression by analysis of variance.                                 | One of the GBM expresses very high amounts of caveolin-1 but not the 8 others.                                                                      | 104       |
| Caveolin-1           | Immuno-histochemistry                           | 73 gliomas including 20 GBM                                                   | Other gliomas (low-grade astrocytomas, oligodendrogliomas. . .) | Variability in caveolin-1 staining both in intensity and in quantity of stained cells                                 | Caveolin-1 expressed in more than 50% of the cells in high-grade tumors. Caveolin-1 is expressed in less than 50% of the cells in low-grade tumors. | 67        |

Abbreviation: GBM, glioblastomas.

tumor. Furthermore, because glioma cells rely on this transporter for cystine uptake, inhibition of system xc causes intracellular glutathione depletion resulting in apoptosis.<sup>73</sup> In tumor cells, xCT inhibition was shown to cause reactive oxygen species-mediated caveolin-1 upregulation and inhibition of tumor cell invasion.<sup>74</sup> Another example is the alkylating agent temozolomide, indicated in GBM treatment. Temozolomide also increased caveolin-1 expression in experimental GBM grown *in vivo*.<sup>75</sup> Of interest, the authors showed that caveolin-1 exogenously applied to GBM cells decreased invasion.<sup>75</sup> Caveolin-1 expression was also increased in glioma cells exposed to ionizing radiation;<sup>76</sup> however, in this study, caveolin-1 was proposed to be upregulated in a transcriptionally independent fashion in multiple cell types in response to genotoxic stress and to participate in DNA damage repair.

One group of investigators has endeavored to directly manipulate caveolin-1 expression levels in the cell line U87MG and tested the resulting phenotype of the cells and their changes in gene expression. They showed that forced expression of caveolin-1 decreased proliferation, clonogenicity, and invasion, whereas downregulation of caveolin-1 had the opposite effect.<sup>77</sup> Gene expression analysis in this study indicated that caveolin-1 controlled genes involved in the regulation of cell invasion and metastasis, for example, the serine protease inhibitor PAI-1 (inversely proportional to caveolin-1) and genes involved in the regulation of cell adhesion, such as integrins (also inversely proportional to caveolin-1 expression).<sup>77</sup> The study further focused on integrin  $\alpha 5 \beta 1$  and showed that GBM cells with caveolin-1 siRNA (and, thus, increased  $\alpha 5$ ) were more sensitive to the  $\alpha 5 \beta 1$  integrin antagonist SJ749. Furthermore, a feedback regulation was suggested, because overexpression of the  $\alpha 5$  subunit in turn upregulated caveolin-1 expression.<sup>77</sup>

## EGFR and Caveolin-1 in GBM

The EGFR is proposed to bind to caveolin-1 via its caveolin-1 binding motif located in the kinase domain<sup>33</sup> and to be maintained in an inactive state by the interaction, moving out of caveolae upon EGF stimulation.<sup>78</sup> The migration or EGFR out of caveolae requires the autophosphorylation of at least one tyrosine residue in the receptor regulatory domain and the binding of EGF.<sup>78</sup> Several major mutated variants of EGFR have been identified in GBM, the most common being variant III (EGFRvIII), caused by an 801 bp in frame deletion of exons 2–7, leading to the expression of a constitutively autophosphorylated receptor lacking a portion of the EGF binding domain that contributes to an aggressive phenotype in GBM.<sup>79</sup> In GBM cells, wild-type EGFR was confirmed to colocalize with lipid rafts and caveolin-1 and to associate with caveolae in a phosphorylation-dependent fashion, because EGF-induced phosphorylation of the receptor resulted in EGFR dissociation from caveolae.<sup>69</sup> In contrast, constitutively active EGFRvIII was predominantly

cytoplasmic and did not associate with the caveolin-1 scaffolding domain unless cells were exposed to a tyrosine kinase inhibitor to prevent receptor phosphorylation.<sup>69</sup> Furthermore, disrupting rafts induced ligand-independent tyrosine phosphorylation of EGFR.<sup>69</sup> Phosphorylation-dependent sequestration of EGFR in caveolae was thus proposed to have the potential to shut down constitutive or EGF-induced signaling in GBM.<sup>69</sup> Of interest, low caveolin-1 expression was shown to correlate with EGFR overexpression in anaplastic astrocytomas.<sup>67</sup> In contrast, caveola disruption using methyl- $\beta$  cyclodextrin was shown to disrupt GBM chemotaxis to EGF,<sup>80</sup> and simvastatin prevented astrocyte activation after traumatic brain injury by decreasing caveolin-1 expression and reducing EGFR phosphorylation.<sup>81</sup>

## Matrix Proteases and Caveolae in GBM

Proteolysis is an essential component of the invasion process through the disruption of basement membrane, extracellular matrix, and cell-cell junctions. Two major proteolytic systems, namely the urokinase and the matrix metalloproteinase (MMP) systems, have been documented to promote GBM invasion. Furthermore, enzymes from both systems have been shown to synergistically interact in GBM.<sup>82,83</sup>

The receptor for urokinase-type plasminogen activator (uPAR) both participates in the activation of uPA, which promotes invasion and angiogenesis via plasminogen activation and further controls intracellular signaling, integrin activation, and fibronectin polymerization. uPAR was reported to be overexpressed in GBM.<sup>84</sup> Caveolin-1 is considered to be an adaptor protein regulating integrin function<sup>85,86</sup> that mediates uPAR-dependent activation of Src and EGFR.<sup>87,88</sup> Both caveolin-1 and the GPI-anchored urokinase receptor uPAR interact with  $\beta$ -1 integrins in a complex that regulates adhesion and signaling through Src-family kinases and focal adhesion kinase (FAK). The formation of such functional units contributes to migration and invasion.<sup>89</sup> In GBM, uPAR controls invasion via proteolysis and key intracellular signaling pathways, including PI3k/Akt and Notch signaling.<sup>90,91</sup> Not surprisingly, uPA and/or uPAR are well-known therapeutic targets in GBM. In addition, the crosstalk between uPAR signaling and EGFR signaling suggests that uPAR and EGFR are valid combined targets for GBM therapy.<sup>92</sup> The role of caveolin-1 in major signaling pathways relevant to GBM is depicted in Fig. 1.

Matrix metalloproteases are a family of endopeptidases mediating pericellular proteolysis in tumor cell invasion through digestion of the extracellular matrix (ECM), release of ECM growth factors, and interaction with adhesion molecules, thereby controlling the tumor microenvironment.<sup>65</sup> MMPs exist as secreted latent soluble forms activated by proteolysis, for example, the gelatinases MMP-2 and MMP-9, and as membrane-inserted enzymes, for example, membrane type

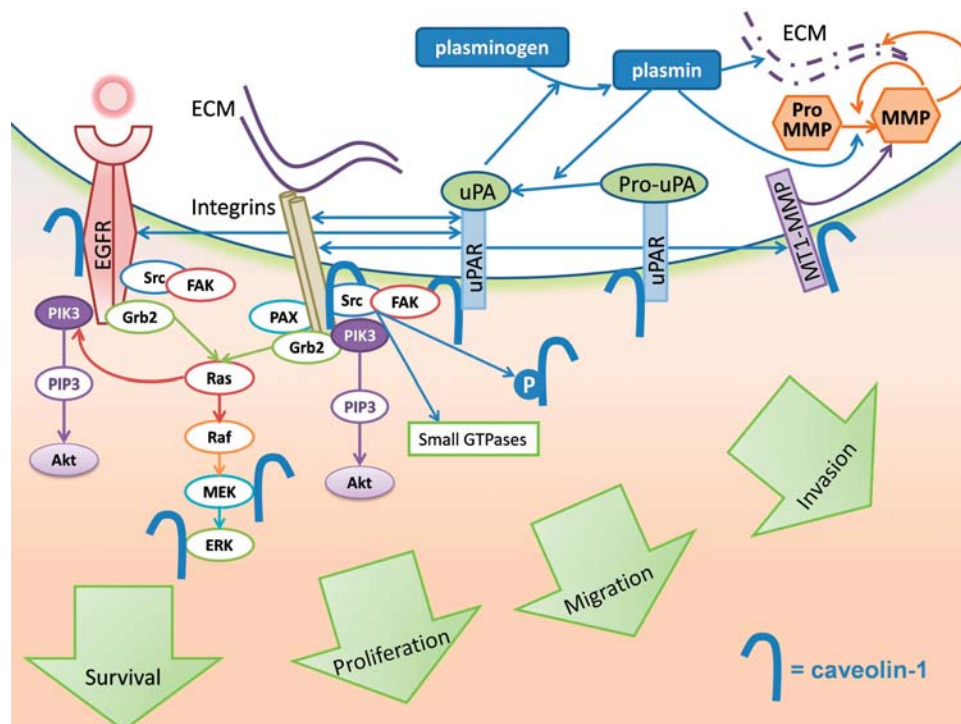

Fig. 1. Multiple signaling pathways essential to GBM growth and invasion are controlled by caveolin-1. Receptor tyrosine kinases (EGFR), integrins, and uPA are concentrated in caveolae and interact with caveolin-1. Downstream signaling is initiated in caveolae. Caveolin-1 undergoes Src family kinase-mediated tyrosine phosphorylation upon EGF stimulation or integrin engagement. Caveolae endocytosis further controls EGFR presence at the cell surface. Binding to the caveolin-1 scaffolding domain inhibits and sequesters EGFR, as well as MT-1 MMP in caveolae. Caveolin-1 also directly inhibits MEK-1 and ERK-2 downstream of the EGFR activation. UPA forms a complex with integrins and caveolin-1 that signals through Src family kinases and focal adhesion kinase (FAK). Via interacting with the uPA receptor and MT1-MMP, caveolin-1 spatially controls extracellular proteolysis, including growth factor release from the extracellular matrix, and basement membrane degradation.

MT1-MMP.<sup>93</sup> MT1-MMP degrades ECM molecules, including constituents of the brain and glioma ECM, and further activates pro-MMP2 into MMP2.<sup>93</sup> Both quantitative expression of MT1-MMP<sup>94</sup> and its subcellular localization<sup>95</sup> have been documented to play a key role in GBM cell migration and invasion. MT1-MMP is localized in caveolae and interacts with phosphocaveolin-1.<sup>96</sup> Overexpression of caveolin-1 in GBM cells markedly represses MT1-MMP-dependent migration.<sup>95</sup>

### Caveolin-1 Negatively Regulates P-gp: Potential Role in Preventing Multidrug Resistance

The permeability glycoprotein (P-gp) transporter is an efflux pump that participates in multidrug resistance by promoting efflux of xenobiotics and, thus, decreasing drug accumulation in the cells. It is highly expressed by endothelial cells and astrocytes at the BBB,<sup>97-99</sup> including the BBB of brain tumors,<sup>100</sup> where it can act to prevent drugs from reaching the brain. In addition, it is expressed by multidrug-resistant tumor cells. Brain tumor cells were shown to express P-gp, although at a

lower level than the tumor capillaries.<sup>100</sup> Immunolabeling and biochemical assays have demonstrated that, in various cell types including astrocytes, a proportion of cell membrane P-gp associates with caveolae, where it interacts with the caveolin-1 scaffolding domain.<sup>56,97</sup> The interaction with caveolin-1 negatively regulates P-gp transport activity, thereby promoting intracellular transport of drugs.<sup>97</sup> In this context, increasing caveolin-1-mediated inhibition of P-gp in GBM cells might increase sensitivity to chemotherapeutic agents.

### Conclusion and Perspectives

There is increasing evidence that caveolin-1 and caveolae play multiple signaling and trafficking functions in GBM marking this organelle and/or its defining protein as targets for a disease that desperately needs novel therapeutic options. Caveolae have been scrutinized as drug delivery routes, and because GBM's caveolae might be used to promote endocytosis of material with potential therapeutic value to cells (eg, pharmacological agents and genetic material). Demonstrated uptake of therapeutic siRNA dendriplexes in GBM cells<sup>72</sup> provides

promising proof of concept for this strategy. In addition, the caveolin-1 inhibitory effect on P-gp has the potential to increase drug delivery to GBM cells via action on the transporter at the BBB and GBM cell levels.

Both increasing and decreasing caveolin-1 expression have been proposed as cancer therapeutic approaches,<sup>9</sup> using ectopic expression of caveolin-1 or siRNA, respectively. In GBM, caveolin-1 overexpression rather than downregulation induced a reduction in proliferation, clonogenicity, and migration.<sup>77</sup> This may seem counterintuitive, as caveolin-1 is reported to be overexpressed in GBM compared with normal astrocytes. However, caveolin-1 exerts multiple effects (direct inhibition, receptor endocytosis from cell surface, and compartmentalization) on multiple signaling pathways key to GBM growth and invasion. Another means of taking advantage of caveolin-1 tonic inhibition on signaling molecules that has proven to be effective in vivo is to mimic the inhibitory effect by using the caveolin-1 scaffolding domain peptide, fused to an internalization sequence allowing cellular uptake.<sup>101</sup> Although initially designed to control nitric oxide production in endothelial cells, this peptide, named cavtratin, was shown to suppress nerve growth factor-induced MAPK activation in oligodendrocytes, indicating that inhibition of growth factor receptors can be achieved in macroglial cells.<sup>102</sup> Mutations of specific

amino acids in the scaffolding domain peptide can perturb, rather than reproduce, the interaction with target signaling molecules,<sup>103</sup> and although this has been worked out for the interaction of caveolin-1 with eNOS, the concept could be applied to generate peptides affecting growth factor receptor inhibition. Lastly, an indirect method to modulate caveolin-1 expression and caveolae function is to interfere with cholesterol homeostasis with use of statins. Of interest, simvastatin decreased caveolin-1 expression and reduced EGFR phosphorylation in astrocytes.<sup>81</sup> It is likely that caveolin-1 will be evaluated as a target in GBM in the near future, alone or in combination with currently available therapies to increase their efficacy.

*Conflict of interest statement.* M-O.P and G.J.R.: no reported conflicts.

## Funding

M-O.P. is funded by the Cancer Council Queensland Research Grant 631368. G.J.R. is funded by the Virginia and D.K. Ludwig Fund for Cancer Research and the Irving J. Sherman M.D. Neurosurgery Research Professorship.

## References

1. Parat MO. The biology of caveolae: achievements and perspectives. *Int Rev Cell Mol Biol.* 2009;273:117–162.
2. Hill MM, Bastiani M, Luetterforst R, et al. PTRF-Cavin, a Conserved Cytoplasmic Protein Required for Caveola Formation and Function. *Cell.* 2008;132(1):113–124.
3. Hayer A, Stoeber M, Bissig C, Helenius A. Biogenesis of Caveolae: Stepwise Assembly of Large Caveolin and Cavin Complexes. *Traffic.* 2010;11(3):361–382.
4. Dietzen DJ, Hastings WR, Lublin DM. Caveolin is palmitoylated on multiple cysteine residues. Palmitoylation is not necessary for localization of caveolin to caveolae. *J Biol Chem.* 1995;270:6838–6842.
5. Epand RM, Sayer BG, Epand RF. Caveolin Scaffolding Region and Cholesterol-rich Domains in Membranes. *Journal of Molecular Biology.* 2005;345(2):339–350.
6. Couet J, Li S, Okamoto T, Ikezu T, Lisanti MP. Identification of peptide and protein ligands for the caveolin- scaffolding domain. Implications for the interaction of caveolin with caveolae-associated proteins. *J Biol Chem.* 1997;272:6525–6533.
7. Schlegel A, Arvan P, Lisanti MP. Caveolin-1 binding to endoplasmic reticulum membranes and entry into the regulated secretory pathway are regulated by serine phosphorylation. Protein sorting at the level of the endoplasmic reticulum. *J Biol Chem.* 2001;276(6):4398–4408.
8. Glenney JR, Jr. Tyrosine phosphorylation of a 22-kDa protein is correlated with transformation by Rous sarcoma virus. *J Biol Chem.* 1989;264:20163–20166.
9. van Golen KL. Is caveolin-1 a viable therapeutic target to reduce cancer metastasis? *Expert Opin Ther Targets.* 2006;10(5):709–721.
10. Thompson TC, Tahir SA, Li L, et al. The role of caveolin-1 in prostate cancer: clinical implications. *Prostate Cancer Prostatic Dis.* 2010;13(1):6–11.
11. Williams TM, Lisanti MP. Caveolin-1 in oncogenic transformation, cancer, and metastasis. *Am J Physiol Cell Physiol.* 2005;288(3):C494–C506.
12. Goetz J, Lajoie P, Wiseman S, Nabi I. Caveolin-1 in tumor progression: the good, the bad and the ugly. *Cancer and Metastasis Reviews.* 2008;27(4):715–735.
13. Engelman JA, Zhang XL, Lisanti MP. Genes encoding human caveolin-1 and -2 are co-localized to the D7S522 locus (7q31.1), a known fragile site (FRA7G) that is frequently deleted in human cancers. *FEBS Lett.* 1998;436:403–410.
14. Tahir SA, Ren C, Timme TL, et al. Development of an immunoassay for serum caveolin-1: a novel biomarker for prostate cancer. *Clin Cancer Res.* 2003;9(10, pt 1):3653–3659.
15. Tahir SA, Yang G, Ebara S, et al. Secreted caveolin-1 stimulates cell survival/clonal growth and contributes to metastasis in androgen-insensitive prostate cancer. *Cancer Res.* 2001;61(10):3882–3885.
16. Tahir SA, Yang G, Goltsov AA, et al. Tumor cell-secreted caveolin-1 has proangiogenic activities in prostate cancer. *Cancer Res.* 2008;68(3):731–739.
17. Goetz JG, Minguet S, Navarro-Lerida I, et al. Biomechanical remodeling of the microenvironment by stromal caveolin-1 favors tumor invasion and metastasis. *Cell.* 2011;146(1):148–163.
18. Hill MM, Parat MO, Parton RG, Soon Lee C. Clearing the confusion of Cav1 and caveolae in cancer compartments. Comment on: *Cell* 2011;146(1), 148–163. *Cell* <http://www.cell.com/abstract/S0092-8674%2811%2900645-3#Comments>. 2011. Ref Type: Internet Communication.
19. Aung CS, Hill MM, Bastiani M, Parton RG, Parat MO. PTRF-cavin-1 expression decreases the migration of PC3 prostate cancer cells: Role of matrix metalloproteinase 9. *Eur J Cell Biol.* 2010;90:136–142.

20. Steffens S, Schrader A, Blasig H, et al. Caveolin 1 protein expression in renal cell carcinoma predicts survival. *BMC Urology*. 2011;11(1):25.
21. Bastiani M, Liu L, Hill MM, et al. MURC/Cavin-4 and cavin family members form tissue-specific caveolar complexes. *J Cell Biol*. 2009;185(7):1259–1273.
22. Jansa P, Grummt I. Mechanism of transcription termination: PTRF interacts with the largest subunit of RNA polymerase I and dissociates paused transcription complexes from yeast and mouse. *Mol Gen Genet*. 1999;262(3):508–514.
23. Jansa P, Mason SW, Hoffmann-Rohrer U, Grummt I. Cloning and functional characterization of PTRF, a novel protein which induces dissociation of paused ternary transcription complexes. *EMBO J*. 1998;17(10):2855–2864.
24. Hasegawa T, Takeuchi A, Miyaiishi O, Xiao H, Mao J, Isobe K. PTRF (polymerase I and transcript-release factor) is tissue-specific and interacts with the BFCOL1 (binding factor of a type-I collagen promoter) zinc-finger transcription factor which binds to the two mouse type-I collagen gene promoters. *Biochem J*. 2000;347(pt 1):55–59.
25. Hansen CG, Bright NA, Howard G, Nichols BJ. SDPR induces membrane curvature and functions in the formation of caveolae. *Nat Cell Biol*. 2009;11(7):807–814.
26. McMahon KA, Zajicek H, Li WP, et al. SRBC/cavin-3 is a caveolin adapter protein that regulates caveolae function. *EMBO J*. 2009;28(8):1001–1015.
27. Bai L, Deng X, Li Q, et al. Down-regulation of the cavin family proteins in breast cancer. *J Cell Biochem*. 2012;113(1):322–328.
28. Gould ML, Williams G, Nicholson HD. Changes in caveolae, caveolin, and polymerase 1 and transcript release factor (PTRF) expression in prostate cancer progression. *Prostate*. 2010;70(15):1609–1621.
29. Inder KL, Zheng YZ, Davis MJ, et al. Expression of PTRF in PC-3 cells modulates cholesterol dynamics and the actin cytoskeleton impacting secretion pathways. *Molecular & Cellular Proteomics*. 2012;11(1):119–131.
30. Allen WL, Stevenson L, Coyle VM, et al. A Systems Biology Approach Identifies SART1 as a Novel Determinant of Both 5-Fluorouracil and SN38 Drug Resistance in Colorectal Cancer. *Molecular Cancer Therapeutics*. 2012;11(2):M111-012245.
31. Guha U, Chaerkady R, Marimuthu A, et al. Comparisons of tyrosine phosphorylated proteins in cells expressing lung cancer-specific alleles of EGFR and KRAS. *PNAS*. 2008;105(37):14112–14117.
32. Mineo C, James GL, Smart EJ, Anderson RG. Localization of epidermal growth factor-stimulated Ras/Raf-1 interaction to caveolae membrane. *J Biol Chem*. 1996;271:11930–11935.
33. Couet J, Sargiacomo M, Lisanti MP. Interaction of a receptor tyrosine kinase, EGF-R, with caveolins. Caveolin binding negatively regulates tyrosine and serine/threonine kinase activities. *J Biol Chem*. 1997;272:30429–30438.
34. Engelman JA, Chu C, Lin A, et al. Caveolin-mediated regulation of signaling along the p42/44 MAP kinase cascade in vivo. A role for the caveolin-scaffolding domain. *FEBS Lett*. 1998;428:205–211.
35. Ringerike T, Blystad FD, Levy FO, Madshus IH, Stang E. Cholesterol is important in control of EGF receptor kinase activity but EGF receptors are not concentrated in caveolae. *J Cell Sci*. 2002;115(6):1331–1340.
36. Sbaa E, Frerart F, Feron O. The double regulation of endothelial nitric oxide synthase by caveolae and caveolin: a paradox solved through the study of angiogenesis. *Trends Cardiovasc Med*. 2005;15(5):157–162.
37. Hill MM, Scherbakov N, Schiefermeier N, et al. Reassessing the role of phosphocaveolin-1 in cell adhesion and migration. *Traffic*. 2007;8(12):1695–1705.
38. Parat MO, Anand-Apte B, Fox PL. Differential caveolin-1 polarization in endothelial cells during migration in two and three dimensions. *Mol Biol Cell*. 2003;14:3156–3168.
39. Santilman V, Baran J, Anand-Apte B, Evans RM, Parat MO. Caveolin-1 polarization in transmigrating endothelial cells requires binding to intermediate filaments. *Angiogenesis*. 2007;10(4):297–305.
40. Lee H, Volonte D, Galbiati F, et al. Constitutive and growth factor-regulated phosphorylation of caveolin-1 occurs at the same site (Tyr-14) in vivo: identification of a c-Src/Cav-1/Grb7 signaling cassette. *Mol Endocrinol*. 2000;14(11):1750–1775.
41. Cao H, Courchesne WE, Mastick CC. A phosphotyrosine-dependent protein interaction screen reveals a role for phosphorylation of caveolin-1 on tyrosine 14: recruitment of C-terminal Src kinase. *J Biol Chem*. 2002;277(11):8771–8774.
42. Gaus K, Le LS, Balasubramanian N, Schwartz MA. Integrin-mediated adhesion regulates membrane order. *J Cell Biol*. 2006;174(5):725–734.
43. Goetz JG, Joshi B, Lajoie P, et al. Concerted regulation of focal adhesion dynamics by galectin-3 and tyrosine-phosphorylated caveolin-1. *J Cell Biol*. 2008;130(6):1261–1273.
44. Radel C, Rizzo V. Integrin mechanotransduction stimulates caveolin-1 phosphorylation and recruitment of Csk to mediate actin reorganization. *Am J Physiol Heart Circ Physiol*. 2005;288(2):H936–H945.
45. del Pozo MA, Balasubramanian N, Alderson NB, et al. Phospho-caveolin-1 mediates integrin-regulated membrane domain internalization. *Nat Cell Biol*. 2005;7(9):901–908.
46. Galbiati F, Volonte D, Gil O, et al. Expression of caveolin-1 and -2 in differentiating PC12 cells and dorsal root ganglion neurons: caveolin-2 is up-regulated in response to cell injury. *Proc Natl Acad Sci USA*. 1998;95:10257–10262.
47. Massa PT. Plasmalemmal vesicles (caveolae) of fibrous astrocytes of the cat optic nerve. *Am J Anat*. 1982;165(1):69–81.
48. Lawrence JM, Raisman G. Membrane specializations and extracellular material associated with host astrocytes in peripheral neural transplants. *Neuroscience*. 1987;20(3):1031–1041.
49. Massa PT, Mugnaini E. Cell-cell junctional interactions and characteristic plasma membrane features of cultured rat glial cells. *Neuroscience*. 1985;14(2):695–709.
50. Cameron PL, Ruffin JW, Bollag R, Rasmussen H, Cameron RS. Identification of caveolin and caveolin-related proteins in the brain. *J Neurosci*. 1997;17(24):9520–9535.
51. Zschocke J, Bayatti N, Behl C. Caveolin and GLT-1 gene expression is reciprocally regulated in primary astrocytes: Association of GLT-1 with non-caveolar lipid rafts. *Glia*. 2005;49(2):275–287.
52. Teixeira A, Chaverot N, Schroder C, Strosberg AD, Couraud PO, Cazaubon S. Requirement of caveolae microdomains in extracellular signal-regulated kinase and focal adhesion kinase activation induced by endothelin-1 in primary astrocytes. *J Neurochem*. 1999;72:120–128.
53. Yun JH, Park SJ, Jo A, et al. Caveolin-1 is involved in reactive oxygen species-induced SHP-2 activation in astrocytes. *Exp Mol Med*. 2011;43(12):660–668.
54. Weerth SH, Holtzclaw LA, Russell JT. Signaling proteins in raft-like microdomains are essential for Ca<sup>2+</sup> wave propagation in glial cells. *Cell Calcium*. 2007;41(2):155–167.



55. Blanco AM, Perez-Arago A, Fernandez-Lizarbe S, Guerri C. Ethanol mimics ligand-mediated activation and endocytosis of IL-1RI/TLR4 receptors via lipid rafts caveolae in astroglial cells. *Journal of Neurochemistry*. 2008;106(2):625–639.
56. Ronaldson PT, Bendayan M, Gingras D, Piquette-Miller M, Bendayan R. Cellular localization and functional expression of P-glycoprotein in rat astrocyte cultures. *Journal of Neurochemistry*. 2004;89(3):788–800.
57. Megias L, Guerri C, Fornas E, et al. Endocytosis and transcytosis in growing astrocytes in primary culture. Possible implications in neural development. *Int J Dev Biol*. 2000;44(2):209–221.
58. Bento-Abreu A, Velasco A, Polo-Hernández E, et al. Albumin endocytosis via megalin in astrocytes is caveola- and Dab-1 dependent and is required for the synthesis of the neurotrophic factor oleic acid. *Journal of Neurochemistry*. 2009;111(1):49–60.
59. Andjelkovic AV, Song L, Dzenko KA, Cong H, Pachter JS. Functional expression of CCR2 by human fetal astrocytes. *Journal of Neuroscience Research*. 2002;70(2):219–231.
60. Ge S, Pachter JS. Caveolin-1 knockdown by small interfering RNA suppresses responses to the chemokine MCP-1 by human astrocytes. *J Biol Chem*. 2004;279(8):6688–6695.
61. Gonzalez MI, Krizman-Genda E, Robinson MB. Caveolin-1 Regulates the Delivery and Endocytosis of the Glutamate Transporter, Excitatory Amino Acid Carrier 1. *Journal of Biological Chemistry*. 2007;282(41):29855–29865.
62. Ito J, Nagayasu Y, Kato K, Sato R, Yokoyama S. Apolipoprotein A-I Induces Translocation of Cholesterol, Phospholipid, and Caveolin-1 to Cytosol in Rat Astrocytes. *Journal of Biological Chemistry*. 2002;277(10):7929–7935.
63. Igbavboa U, Sun GY, Weisman GA, He Y, Wood WG. Amyloid beta-protein stimulates trafficking of cholesterol and caveolin-1 from the plasma membrane to the Golgi complex in mouse primary astrocytes. *Neuroscience*. 2009;162(2):328–338.
64. Ahn M, Kim H, Kim JT, et al. Gamma-ray irradiation stimulates the expression of caveolin-1 and GFAP in rat spinal cord: a study of immunoblot and immunohistochemistry. *J Vet Sci*. 2006;7(4):309–314.
65. Alves TR, Lima FRS, Kahn SA, et al. Glioblastoma cells: A heterogeneous and fatal tumor interacting with the parenchyma. *Life Sciences*. 2011;89(15–16):532–539.
66. Cassoni P, Senetta R, Castellano I, et al. Caveolin-1 Expression is Variably Displayed in Astroglial-derived Tumors and Absent in Oligodendrogliomas: Concrete Premises for a New Reliable Diagnostic Marker in Gliomas. *The American Journal of Surgical Pathology*. 2007;31(5):760–769.
67. Barresi V, Buttarelli FR, Vitarelli E E, Arcella A, Antonelli M, Giangaspero F. Caveolin-1 expression in diffuse gliomas: correlation with the proliferation index, epidermal growth factor receptor, p53, and 1p/19q status. *Human Pathology*. 2009;40(12):1738–1746.
68. Sallinen SL, Sallinen PK, Haapasalo HK, et al. Identification of differentially expressed genes in human gliomas by DNA microarray and tissue chip techniques. *Cancer Res*. 2000;60(23):6617–6622.
69. Abulrob A, Giuseppin S, Andrade MF, McDermid A, Moreno M, Stanimirovic D. Interactions of EGFR and caveolin-1 in human glioblastoma cells: evidence that tyrosine phosphorylation regulates EGFR association with caveolae. *Oncogene*. 2004;23(41):6967–6979.
70. Cameron PL, Liu C, Smart DK, Hantus ST, Fick JR, Cameron RS. Caveolin-1 expression is maintained in rat and human astroglia cell lines. *Glia*. 2002;37(3):275–290.
71. Ludwig HC, Rausch S, Schallock K, Markakis E. Expression of CD 73 (ecto-5'-nucleotidase) in 165 glioblastomas by immunohistochemistry and electronmicroscopic histochemistry. *Anticancer Res*. 1999;19(3A):1747–1752.
72. Perez AP, Cosaka ML, Romero EL, Morilla MJ. Uptake and intracellular traffic of siRNA dendriplexes in glioblastoma cells and macrophages. *Int J Nanomedicine*. 2011;6:2715–2728.
73. Chung WJ, Lyons SA, Nelson GM, et al. Inhibition of cystine uptake disrupts the growth of primary brain tumors. *J Neurosci*. 2005;25(31):7101–7110.
74. Chen RS, Song YM, Zhou ZY, et al. Disruption of xCT inhibits cancer cell metastasis via the caveolin-1/[beta]-catenin pathway. *Oncogene*. 2008;28(4):599–609.
75. Bruyere C, Abeloos L, Lamoral-Theys D, et al. Temozolomide modifies caveolin-1 expression in experimental malignant gliomas in vitro and in vivo. *Transl Oncol*. 2011;4(2):92–100.
76. Zhu H, Yue J, Pan Z, et al. Involvement of Caveolin-1 in Repair of DNA Damage through Both Homologous Recombination and Non-Homologous End Joining. *PLoS ONE*. 2010;5(8):e12055.
77. Martin S, Cosset EC, Terrand J, Maglott A, Takeda K, Dontenwill M. Caveolin-1 regulates glioblastoma aggressiveness through the control of alpha(5)beta(1) integrin expression and modulates glioblastoma responsiveness to SJ749, an alpha(5)beta(1) integrin antagonist. *Biochimica et Biophysica Acta (BBA) - Molecular Cell Research*. 2009;1793(2):354–367.
78. Mineo C, Gill GN, Anderson RG. Regulated Migration of Epidermal Growth Factor Receptor from Caveolae. *J Biol Chem*. 1999;274:30636–30643.
79. Nishikawa R, Ji XD, Harmon RC, et al. A mutant epidermal growth factor receptor common in human glioma confers enhanced tumorigenicity. *PNAS*. 1994;91(16):7727–7731.
80. Bomben VC, Turner KL, Barclay TT, Sontheimer H. Transient receptor potential canonical channels are essential for chemotactic migration of human malignant gliomas. *Journal of Cellular Physiology*. 2011;226(7):1879–1888.
81. Wu H, Mahmood A, Lu D, et al. Attenuation of astrogliosis and modulation of endothelial growth factor receptor in lipid rafts by simvastatin after traumatic brain injury. *Journal of Neurosurgery*. 2009;113(3):591–597.
82. Le DM, Besson A, Fogg DK, et al. Exploitation of astrocytes by glioma cells to facilitate invasiveness: a mechanism involving matrix metalloproteinase-2 and the urokinase-type plasminogen activator-plasmin cascade. *J Neurosci*. 2003;23(10):4034–4043.
83. Lakka SS, Gondi CS, Dinh DH, et al. Specific Interference of Urokinase-type Plasminogen Activator Receptor and Matrix Metalloproteinase-9 Gene Expression Induced by Double-stranded RNA Results in Decreased Invasion, Tumor Growth, and Angiogenesis in Gliomas. *Journal of Biological Chemistry*. 2005;280(23):21882–21892.
84. Salajegheh M, Rudnicki A, Smith TW. Expression of urokinase-type plasminogen activator receptor (uPAR) in primary central nervous system neoplasms. *Appl Immunohistochem Mol Morphol*. 2005;13(2):184–189.
85. Chapman HA, Wei Y, Simon DI, Waltz DA. Role of urokinase receptor and caveolin in regulation of integrin signaling. *Thromb Haemost*. 1999;82(2):291–297.
86. Wary KK, Mariotti A, Zurzolo C, Giancotti FG. A requirement for caveolin-1 and associated kinase Fyn in integrin signaling and anchorage-dependent cell growth. *Cell*. 1998;94:625–634.

87. Monaghan-Benson E, Keown-Longo PJ. Urokinase-type Plasminogen Activator Receptor Regulates a Novel Pathway of Fibronectin Matrix Assembly Requiring Src-dependent Transactivation of Epidermal Growth Factor Receptor. *Journal of Biological Chemistry*. 2006;281(14):9450–9459.
88. Monaghan-Benson E, Mastick CC, Keown-Longo PJ. A dual role for caveolin-1 in the regulation of fibronectin matrix assembly by uPAR. *J Cell Sci*. 2008;121(22):3693–3703.
89. Preissner KT, Kanse SM, May AE. Urokinase receptor: a molecular organizer in cellular communication. *Curr Opin Cell Biol*. 2000;12(5):621–628.
90. Chandrasekar N, Mohanam S, Gujrati M, Olivero WC, Dinh DH, Rao JS. Downregulation of uPA inhibits migration and PI3k/Akt signaling in glioblastoma cells. *Oncogene*. 2003;22(3):392–400.
91. Raghu H, Gondi C, Dinh D, Gujrati M, Rao J. Specific knockdown of uPA/uPAR attenuates invasion in glioblastoma cells and xenografts by inhibition of cleavage and trafficking of Notch -1 receptor. *Molecular Cancer*. 2011;10(1):130.
92. Hu J, Jo M, Cavenee WK, Furnari F, VandenBerg SR, Gonias SL. Crosstalk between the urokinase-type plasminogen activator receptor and EGF receptor variant III supports survival and growth of glioblastoma cells. *PNAS*. 2011;108(38):15984–15989.
93. Fillmore HL, VanMeter TE, Broaddus WC. Membrane-type Matrix Metalloproteinases (MT-MMP): Expression and Function During Glioma Invasion. *Journal of Neuro-Oncology*. 2001;53(2):187–202.
94. Deryugina EI, Bourdon MA, Luo GX, Reisfeld RA, Strongin A. Matrix metalloproteinase-2 activation modulates glioma cell migration. *J Cell Sci*. 1997;110(19):2473–2482.
95. Annabi B, Lachambre M, Bousquet-Gagnon N, Page M, Gingras D, Beliveau R. Localization of membrane-type 1 matrix metalloproteinase in caveolae membrane domains. *Biochem J*. 2001;353(pt 3):547–553.
96. Labrecque L, Nyalendo C, Langlois S, et al. Src-mediated Tyrosine Phosphorylation of Caveolin-1 Induces Its Association with Membrane Type 1 Matrix Metalloproteinase. *J Biol Chem*. 2004;279(50):52132–52140.
97. Jodoin J, Demeule M, Fenart L, et al. P-glycoprotein in blood–brain barrier endothelial cells: interaction and oligomerization with caveolins. *Journal of Neurochemistry*. 2003;87(4):1010–1023.
98. Golden PL, Pardridge WM. P-glycoprotein on astrocyte foot processes of unfixed isolated human brain capillaries. *Brain Research*. 1999;819(1–2):143–146.
99. Bendayan R, Ronaldson PT, Gingras D, Bendayan M. In Situ Localization of P-glycoprotein (ABCB1) in Human and Rat Brain. *Journal of Histochemistry & Cytochemistry*. 2006;54(10):1159–1167.
100. Guo Z, Zhu J, Zhao L, Luo Q, Jin X. Expression and clinical significance of multidrug resistance proteins in brain tumors. *J Exp Clin Cancer Res*. 2010;29:122.
101. Bucci M, Gratton JP, Rudic RD, et al. In vivo delivery of the caveolin-1 scaffolding domain inhibits nitric oxide synthesis and reduces inflammation. *Nat Med*. 2000;6(12):1362–1367.
102. Schmitz M, Zerr I, Althaus H. Effect of Cavtratin, a Caveolin-1 Scaffolding Domain Peptide, on Oligodendroglial Signaling Cascades. *Cellular and Molecular Neurobiology*. 2011;31(7):991–997.
103. Bernatchez P, Sharma A, Bauer PM, Marin E, Sessa WC. A noninhibitory mutant of the caveolin-1 scaffolding domain enhances eNOS-derived NO synthesis and vasodilation in mice. *J Clin Invest*. 2011;121(9):3747–3755.
104. Forget MA, Desrosiers RR, Del Maestro RF, et al. The expression of Rho proteins decreases with human brain tumor progression: Potential tumor markers. *Clinical and Experimental Metastasis*. 2002;19(1):9–15.
